# Supplementary material
Source: publisher figshare collection journal article supplement (https://karger.figshare.com/ndownloader/files/27697779)
Supplement: Supplementary file 1 [file 27697779]

Supplementary Table S1The characteristics of all subjects at baseline

| Characteristics | All subjects (5235) | Subgroup subjects | | *t/χ2* | *P* |
| --- | --- | --- | --- | --- | --- |
| No hypertension (3084) | Hypertension (2151) |
| Age (year)※ | 40.98±8.22 | 41.51±8.68 | 40.23±7.46 | 5.68 | < 0.001 |
| BMI (kg/m2)※ | 22.62±2.92 | 22.34±2.85 | 23.03±2.98 | -8.41 | < 0.001 |
| WC (cm)※ | 77.97±9.39 | 77.11±8.95 | 79.21±9.86 | -7.90 | < 0.001 |
| Sex |  |  |  | 17.46 | < 0.001 |
| Male | 2443(46.67) | 1365 (44.26) | 1078 (50.12) |  |  |
| Female | 2792(53.33) | 1719 (55.74) | 1073 (49.88) |  |  |
| Education degree |  |  |  | 48.16 | < 0.001 |
| Primary school or none | 1941(37.49) | 1035 (33.96) | 906(42.53) |  |  |
| Middle school | 3045(58.81) | 1874 (61.48) | 1171(54.98) |  |  |
| College or above | 192(3.70) | 139 (4.56) | 53(2.49) |  |  |
| Married status |  |  |  | 19.57 | 0.001 |
| unmarried | 108(2.07) | 77(2.50) | 31(1.45) |  |  |
| married | 4948(94.79) | 2894(94.02) | 2054(95.89) |  |  |
| Divorced | 68(1.30) | 54(1.75) | 14(0.65) |  |  |
| Widowed | 80(1.53) | 44(1.43) | 36(1.68) |  |  |
| Separated | 16(0.31) | 9(0.30) | 7(0.33) |  |  |
| Smoking |  |  |  | 13.83 | < 0.001 |
| No | 3429(65.50) | 2083 (67.54) | 1346 (62.58) |  |  |
| Yes | 1806(34.50) | 1001 (32.46) | 805 (37.42) |  |  |
| Drinking |  |  |  | 10.42 | 0.001 |
| No | 3198(61.09) | 1940 (62.91) | 1258 (58.48) |  |  |
| Yes | 2037(38.91) | 1144 (37.09) | 893 (41.52) |  |  |
| Ethnicity |  |  |  | 8.67 | 0.003 |
| Han | 4695(89.68) | 2734 (88.65) | 1961 (91.17) |  |  |
| Other | 540(10.32) | 350 (11.35) | 190 (8.83) |  |  |
| Physical activity |  |  |  | 17.38 | < 0.001 |
| No | 4775(91.21) | 2771 (89.85) | 2004 (93.17) |  |  |
| Yes | 460(8.79) | 313 (10.15) | 147 (6.83) |  |  |
| Abdominal obesity |  |  |  | 22.25 | < 0.001 |
| No | 3911(74.71) | 2377 (77.08) | 1534 (71.32) |  |  |
| Yes | 1324(25.29) | 707 (22.92) | 617 (28.68) |  |  |
| General obesity |  |  |  | 56.51 | < 0.001 |
| No | 3453(65.96) | 2161 (70.07) | 1292 (60.07) |  |  |
| Yes | 1782(34.04) | 923 (29.93) | 859 (39.93) |  |  |
| Obesity patterns |  |  |  | 51.92 | < 0.001 |
| G-/A- | 3138(59.94) | 1971 (63.91) | 1167 (54.26) |  |  |
| G+/A- or G-/A+ | 1088(20.78) | 596 (19.33) | 492 (22.87) |  |  |
| G+/A+ | 1009(19.28) | 517 (16.76) | 492 (22.87) |  |  |
| Famine＃ |  |  |  | 50.07 | < 0.001 |
| No exposure | 1509(28.83) | 966 (31.32) | 543 (25.24) |  |  |
| Fetal life | 683(13.05) | 439 (14.23) | 244 (11.34) |  |  |
| Early childhood | 955(18.24) | 560 (18.16) | 395 (18.36) |  |  |
| Mid- childhood | 1012(19.33) | 555 (18.00) | 457 (21.25) |  |  |
| Late childhood | 1076(20.55) | 564 (18.29) | 512 (23.81) |  |  |
| Region |  |  |  | 10.86 | 0.001 |
| Urban | 1883(35.97) | 1053 (34.14) | 830 (38.59) |  |  |
| Rural | 3352(64.03) | 2031 (65.86) | 1321 (61.41) |  |  |
| Famine severity |  |  |  | 60.48 | < 0.001 |
| Less severely famine | 2047(39.10) | 1341 (43.48) | 706 (32.82) |  |  |
| Severely famine | 3188(60.90) | 1743 (56.52) | 1445 (67.18) |  |  |

※These variables were analyzed using t- test.

G-/A-: subjects without neither general obesity nor abdominal obesity; G+/A- or G-/A+: subjects with either general obesity or abdominal obesity; G+/A+: subjects with both general obesity and abdominal obesity.

Supplementary Table S2 The distribution of obesity patterns across the different famine exposure periods

| Obesity patterns | No exposure | Fetal life | Early childhood | Mid- childhood | Late childhood | *χ2* | *P* |
| --- | --- | --- | --- | --- | --- | --- | --- |
| **Whole** |  |  |  |  |  | 34.17 | < 0.001 |
| G-/A- | 969(64.21) | 396(57.98) | 577(60.42) | 594(58.70) | 602(55.94) |  |  |
| G+/A- or G-/A+ | 301(19.95) | 153(22.40) | 203(21.26) | 218(21.54) | 213(19.80) |  |  |
| G+/A+ | 239(15.84) | 134(19.62) | 175(18.32) | 200(19.76) | 261(24.26) |  |  |
| **Males** |  |  |  |  |  | 9.70 | 0.287 |
| G-/A- | 488(67.68) | 190(61.69) | 316(69.61) | 300(64.24) | 331(67.14) |  |  |
| G+/A- or G-/A+ | 149(20.67) | 77(25.00) | 86(18.94) | 106(22.70) | 92(18.66) |  |  |
| G+/A+ | 84(11.65) | 41(13.31) | 52(11.45) | 61(13.06) | 70(14.20) |  |  |
| **Females** |  |  |  |  |  | 39.16 | < 0.001 |
| G-/A- | 481(61.04) | 206(54.93) | 261(52.10) | 294(53.94) | 271(46.49) |  |  |
| G+/A- or G-/A+ | 152(19.29) | 76(20.27) | 117(23.25) | 112(20.56) | 121(20.75) |  |  |
| G+/A+ | 155(19.67) | 93(24.80) | 123(24.55) | 139(25.50) | 191(32.76) |  |  |

G-/A-: subjects without neither general obesity nor abdominal obesity; G+/A- or G-/A+: subjects with either general obesity or abdominal obesity; G+/A+: subjects with both general obesity and abdominal obesity.

Supplementary Table S3 The associations of general obesity and abdominal obesity with the incidence of hypertension according to famine exposure

|  | *P interaction* | No exposure | | Fetal life exposure | | Early childhood exposure | | Mid-childhood exposure | | Late childhood exposure | |
| --- | --- | --- | --- | --- | --- | --- | --- | --- | --- | --- | --- |
| *P* | *HR (95%CI)* | *P* | *HR (95%CI)* | *P* | *HR (95%CI)* | *P* | *HR (95%CI)* | *P* | *HR (95%CI)* |
| **BMI** |  |  |  |  |  |  |  |  |  |  |  |
| **Whole cohort** | 0.030 |  |  |  |  |  |  |  |  |  |  |
| Normal |  | 1 | 1 | 1 | 1 | 1 | 1 | 1 | 1 | 1 | 1 |
| General obesity |  | <0.001 | 1.964(1.627,2.371) | <0.001 | 1.746(1.334,2.285) | <0.001 | 1.506(1.213,1.868) | <0.001 | 1.516(1.237,1.858) | <0.001 | 1.995(1.657,2.402) |
| **Males** | 0.046 |  |  |  |  |  |  |  |  |  |  |
| Normal |  | 1 | 1 | 1 | 1 | 1 | 1 | 1 | 1 | 1 | 1 |
| General obesity |  | <0.001 | 2.131(1.642,2.765) | 0.009 | 1.673(1.135,2.466) | 0.037 | 1.396(1.020,1.909) | 0.001 | 1.649(1.221,2.227) | <0.001 | 2.307(1.735,3.067) |
| **Females** | 0.325 |  |  |  |  |  |  |  |  |  |  |
| Normal |  | 1 | 1 | 1 | 1 | 1 | 1 | 1 | 1 | 1 | 1 |
| General obesity |  | <0.001 | 1.782(1.352,2.348) | 0.001 | 1.883(1.278,2.776) | 0.002 | 1.621(1.196,2.197) | 0.007 | 1.487(1.117,1.980) | <0.001 | 1.822(1.424,2.331) |
| **WC** |  |  |  |  |  |  |  |  |  |  |  |
| **Whole cohort** | 0.031 |  |  |  |  |  |  |  |  |  |  |
| Normal |  | 1 | 1 | 1 | 1 | 1 | 1 | 1 | 1 | 1 | 1 |
| Abdominal obesity |  | <0.001 | 1.898(1.531,2.353) | <0.001 | 1.996(1.470,2.711) | 0.008 | 1.420(1.096,1.838) | 0.001 | 1.467(1.163,1.849) | <0.001 | 1.901(1.548,2.334) |
| **Males** | 0.092 |  |  |  |  |  |  |  |  |  |  |
| Normal |  | 1 | 1 | 1 | 1 | 1 | 1 | 1 | 1 | 1 | 1 |
| Abdominal obesity |  | <0.001 | 2.070(1.496,2.866) | 0.035 | 1.730(1.040,2.880) | 0.074 | 1.510(0.962,2.371) | 0.022 | 1.542(1.064,2.237) | 0.002 | 1.830(1.253,2.672) |
| **Females** | 0.081 |  |  |  |  |  |  |  |  |  |  |
| Normal |  | 1 | 1 | 1 | 1 | 1 | 1 | 1 | 1 | 1 | 1 |
| Abdominal obesity |  | <0.001 | 1.729(1.295,2.307) | <0.001 | 2.313(1.544,3.464) | 0.035 | 1.411(1.025,1.942) | 0.004 | 1.552(1.147,2.099) | <0.001 | 1.946(1.518,2.495) |

Supplementary Table S4 The associations of famine exposure with the incidence of hypertension according to general obesity and abdominal obesity

|  | *P interaction* | No exposure | | Fetal life exposure | | Early childhood exposure | | Mid-childhood exposure | | Late childhood exposure | |
| --- | --- | --- | --- | --- | --- | --- | --- | --- | --- | --- | --- |
| *P* | *HR (95%CI)* | *P* | *HR (95%CI)* | *P* | *HR (95%CI)* | *P* | *HR (95%CI)* | *P* | *HR (95%CI)* |
| **BMI** |  |  |  |  |  |  |  |  |  |  |  |
| **Whole cohort** | 0.030 |  |  |  |  |  |  |  |  |  |  |
| Normal |  | 1 | 1 | 0.073 | 0.789(0.613,1.016) | 0.164 | 0.832(0.659,1.050) | 0.022 | 0.751(0.583,0.969) | <0.001 | 0.585(0.435,0.788) |
| General obesity |  | 1 | 1 | 0.013 | 0.696(0.514,0.942) | <0.001 | 0.629(0.472,0.837) | <0.001 | 0.600(0.445,0.809) | 0.001 | 0.622(0.453,0.853) |
| **Males** | 0.046 |  |  |  |  |  |  |  |  |  |  |
| Normal |  | 1 | 1 | 0.106 | 0.731(0.510,1.046) | 0.212 | 0.793(0.579,1.086) | 0.040 | 0.697(0.492,0.988) | 0.001 | 0.539(0.362,0.802) |
| General obesity |  | 1 | 1 | 0.019 | 0.614(0.401,0.941) | 0.002 | 0.556(0.368,0.842) | 0.007 | 0.582(0.379,0.893) | 0.049 | 0.625(0.391,0.999) |
| **Females** | 0.325 |  |  |  |  |  |  |  |  |  |  |
| Normal |  | 1 | 1 | 0.700 | 0.865(0.605,1.237) | 0.800 | 0.887(0.625,1.258) | 0.534 | 0.828(0.568,1.207) | 0.074 | 0.654(0.415,1.029) |
| General obesity |  | 1 | 1 | 0.407 | 0.777(0.504,1.196) | 0.133 | 0.717(0.481,1.070) | 0.030 | 0.632(0.412,0.968) | 0.034 | 0.632(0.409,0.975) |
| **WC** |  |  |  |  |  |  |  |  |  |  |  |
| **Whole cohort** | 0.031 |  |  |  |  |  |  |  |  |  |  |
| Normal |  | 1 | 1 | 0.011 | 0.757(0.602,0.952) | 0.062 | 0.816(0.661,1.007) | 0.003 | 0.724(0.574,0.914) | <0.001 | 0.576(0.440,0.756) |
| Abdominal obesity |  | 1 | 1 | 0.512 | 0.826(0.572,1.193) | 0.011 | 0.647(0.453,0.924) | 0.019 | 0.665(0.466,0.949) | 0.087 | 0.716(0.495,1.034) |
| **Males** | 0.092 |  |  |  |  |  |  |  |  |  |  |
| Normal |  | 1 | 1 | 0.036 | 0.726(0.536,0.985) | 0.056 | 0.764(0.582,1.005) | 0.010 | 0.692(0.513,0.934) | 0.001 | 0.586(0.417,0.824) |
| Abdominal obesity |  | 1 | 1 | 0.446 | 0.697(0.370,1.316) | 0.079 | 0.549(0.288,1.049) | 0.234 | 0.629(0.331,1.194) | 0.254 | 0.603(0.295,1.235) |
| **Females** | 0.081 |  |  |  |  |  |  |  |  |  |  |
| Normal |  | 1 | 1 | 0.347 | 0.805(0.568,1.141) | 0.812 | 0.894(0.640,1.248) | 0.195 | 0.755(0.520,1.096) | 0.006 | 0.557(0.355,0.874) |
| Abdominal obesity |  | 1 | 1 | 0.948 | 0.904(0.575,1.422) | 0.141 | 0.701(0.454,1.082) | 0.133 | 0.696(0.450,1.077) | 0.405 | 0.773(0.496,1.203) |
